# Supplementary material for: The role of counter-anions in the kinetics and chirality of porphyrin J-aggregates
Source: Royal Society of Chemistry journal article supplement (doi:10.1039/c6cc05768c), 2016-01-01
Supplement: c6cc05768c1.pdf [file c6cc05768c1.pdf]

## Electronic Supporting Information

for

### Counter-anions role on the kinetics and chirality of porphyrin J-aggregates

I. G. Occhiuto,<sup>a,b</sup> R. Zagami,<sup>c</sup> M. Trapani,<sup>c</sup> L. Bolzonello,<sup>b</sup> A. Romeo,<sup>a,c</sup> M. A. Castriciano,<sup>c\*</sup> E.

Collini<sup>b</sup> and L. Monsù Scolaro<sup>a,c\*</sup>

<sup>a</sup>Dipartimento di Scienze Chimiche, Biologiche, Farmaceutiche ad Ambientali, and C.I.R.C.M.S.B., University of Messina, V.le F. Stagno D'Alcontres 31, Vill. S. Agata, 98166 Messina, Italy. E-mail: lmonsu@unime.it.

<sup>b</sup>Dipartimento di Scienze Chimiche, University of Padova, 35131, V. F. Marzolo 1 Padova, Italy.

<sup>c</sup>CNR-ISMN, Istituto per lo Studio dei Materiali Nanostrutturati, c/o Dipartimento di Scienze Chimiche, Biologiche, Farmaceutiche ad Ambientali 98166, V.le F. Stagno D'Alcontres 31 Messina, Italy. E-mail: castriciano@pa.ismn.cnr.it.

#### Experimental section

The porphyrin meso-tetrakis(4-sulfonatophenyl)porphyrin (TPPS<sub>4</sub>) was purchased from Aldrich Co. as the tetrasodium salt. Aqueous stock solutions of this porphyrin (200 μM) were prepared in dust-free Millipore water, stored in the dark in glass vials, and used within a week of preparation. The concentration of the porphyrin samples was determined spectrophotometrically using  $\epsilon_{414} = 5.33 \times 10^5 \text{ M}^{-1} \text{ cm}^{-1}$  in water. High purity inorganic acids (H<sub>2</sub>SO<sub>4</sub>, HCl, HBr, HNO<sub>3</sub>, HClO<sub>4</sub>) were purchased from Aldrich Co. Samples of J-aggregated TPPS<sub>4</sub> were prepared following the porphyrin first (PF) mixing protocol: (PF) consists of the addition of a predetermined volume of acid stock solution to a diluted porphyrin sample. Aggregation was carried out in 0.5 M acid solution. UV/Vis spectra were collected with a Hewlett-Packard 8453 diode array spectrophotometer using 1 cm pathlength quartz cells. Kinetic experiments were carried out in the thermostated compartment of the spectrophotometer at 298K, with a temperature accuracy of  $\pm 0.1$  K. The analysis of the kinetic profiles was performed using a non-linear fit of the extinction data according to equation 1:

$$\text{Eq. 1} \quad \text{Ext} = \text{Ext}_{\text{inf}} + (\text{Ext}_0 - \text{Ext}_{\text{inf}}) (1 + (m - 1)\{k_0 t + (n + 1)^{-1} (k_c t)^{n+1}\})^{-1/(m-1)}$$

(Ext, Ext<sub>0</sub> and Ext<sub>∞</sub> are the extinction at time t, at starting time and at the end of aggregation, respectively).

The circular dichroism (CD) spectra were recorded on a JASCO J-720 spectropolarimeter, equipped with a 150 W xenon lamp. The ellipticity was obtained by calibrating the instrument with a 0.06% aqueous solution of R-camphorsulfonic acid. CD spectra were corrected both for the cell and

solvent contributions. To quantify the sign and magnitude of the supramolecular chirality we used the dissymmetry factor  $g = \Delta\varepsilon/\varepsilon = \Delta A/A$ ,  $\Delta A = \Theta/32980$ , where:  $\Delta A$  in absorbance units,  $\Theta$  is ellipticity in mdeg).

The values for the parameter  $\Delta G_{HB}$  (used in Figs 3 and 4) have been calculated from the values of the changes of entropy associated with the structural variations,  $\Delta S_{struct}$ , reported in Table 7 of ref. 19 for the various anions, according to the following equation:

$$\Delta G_{HB} = -0.18 - 1.022 \times 10^{-2} \times (\Delta S_{struct} / \text{J K}^{-1} \text{ mol}^{-1})$$
